# Supplementary material for: Functionally integrating nanoparticles alleviate deep vein thrombosis in pregnancy and rescue intrauterine growth restriction
Source: PubMed Central journal article supplement (PMC9684510; doi:10.1038/s41467-022-34878-2), 2022-11-22
Supplement: 41467_2022_34878_MOESM3_ESM.pdf [file 41467_2022_34878_MOESM3_ESM.pdf]

## **Description of Additional Supplementary Files**

**Supplementary Movie 1:** Merged movie of CTLH NP accumulation in stenosis-induced DVT in pregnant rats. Two-photon microscopy observation of the co-localization of Cy3-CTLH NP with FITC-labelled fibrin in the left iliac vein with stenosis-induced DVT for 0 to 4 h after i.v. injection of Cy3-CTLH NP.

**Supplementary Movie 2:** Merged movie of CTLH NP accumulation in FeCl<sub>3</sub>-induced DVT in pregnant rats. Two-photon microscopy observation of the co-localization of Cy3-CTLH NP with FITC-labelled fibrin in the left iliac vein with FeCl<sub>3</sub>-induced thrombosis for 0 to 4 h after i.v. injection of Cy3-CTLH NP.
